# Supplementary material for: DRUID: a pipeline for transcriptome-wide measurements of mRNA stability
Source: RNA. 2018 May;24(5):623–32. doi: 10.1261/rna.062877.117 (PMC5900561; doi:10.1261/rna.062877.117)
Supplement: Supplemental Material [file supp_062877.117_Supplemental_Figure_S2.pdf]

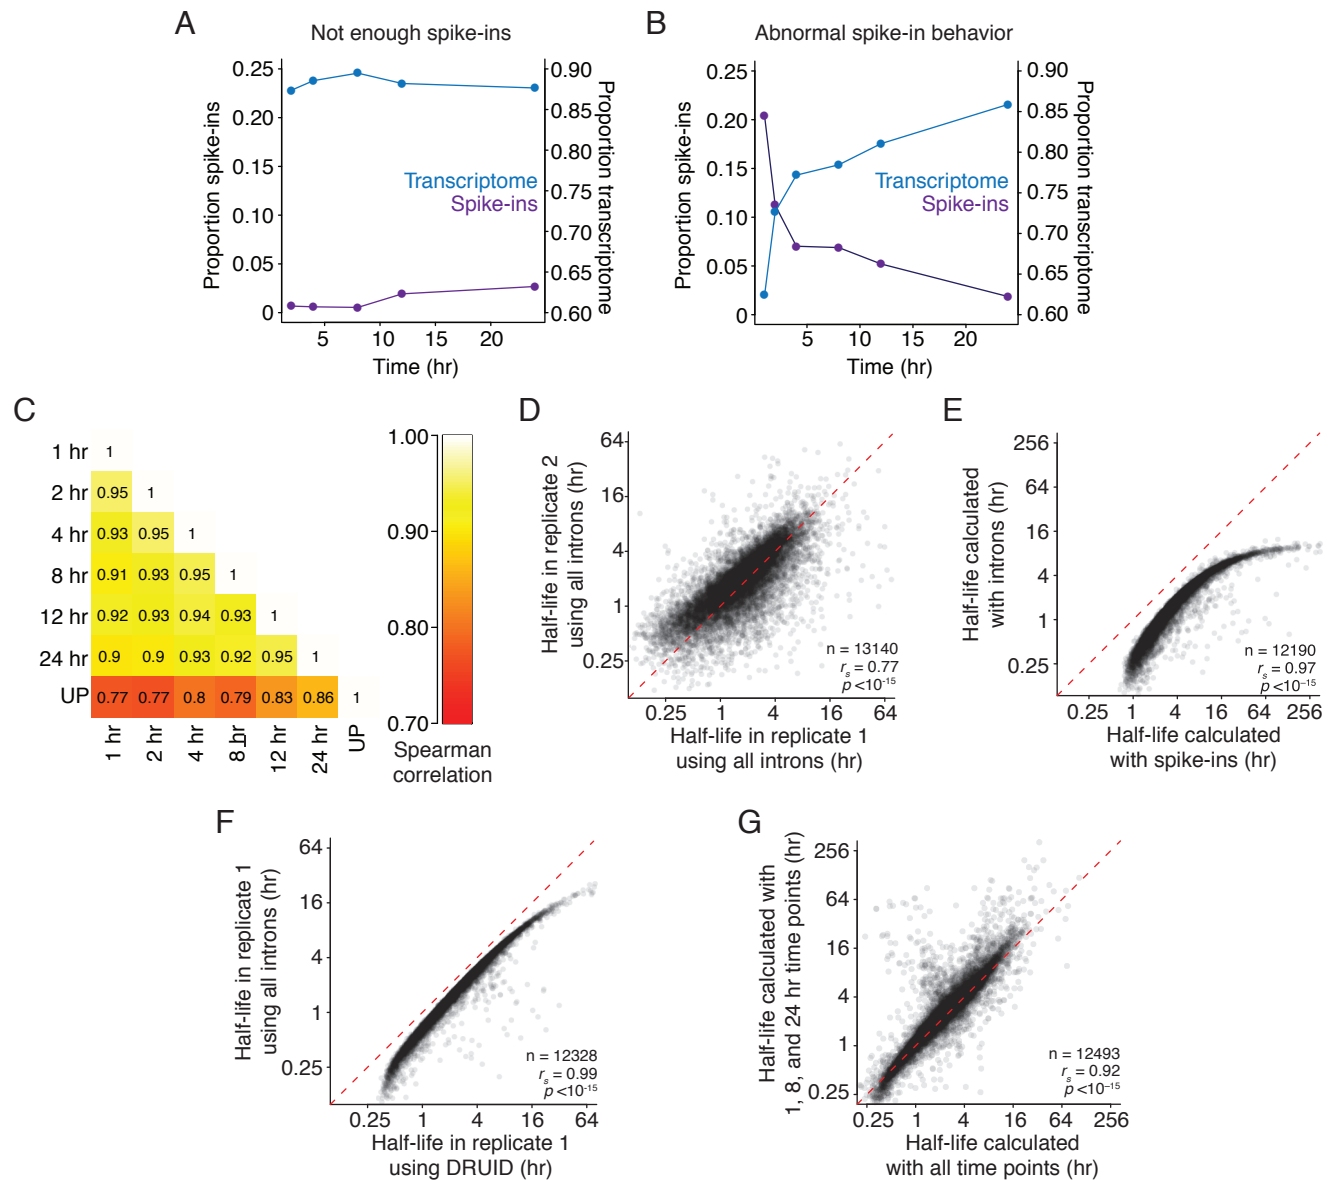

### Supplemental Figure S2. The behavior of approach-to-equilibrium half-lives using DRUID.

(A) Ratios of fly to human reads through the time course for recalcitrant dataset 1. The fraction of reads mapping to the human (in blue) or *Drosophila* (in purple) genome is plotted for each time point. Here, insufficient levels of exogenous spike-ins meant that half-lives could not be calculated. (B) Ratios of fly to human reads through the time course for recalcitrant dataset 2, otherwise as in (A). Here, the exogenous spike-ins exhibited abnormal behavior, and calculated half-lives were not reproducible. (C) Comparisons of human intron abundance between samples. A heatmap is plotted comparing the calculated human intron abundance in each purified sample, as well as the unpurified (UP) sample. Values in each box are Spearman correlations;  $n = 11,460$ . (D) mRNA half-lives calculated by intron normalization. A scatterplot comparing the mRNA half-lives in two replicates using intron-normalization. The red dashed line represents the  $x = y$  line. (E) Comparison of half-lives determined by exogenous spike-in and intron normalization, otherwise as in (D). (F) The effect of restricting introns used in calculated half-lives. A scatterplot comparing mRNAs half-lives using all introns or only the well-behaved set. Otherwise as in (D). (G) mRNA half-lives calculated using only three time points. A scatterplot comparing DRUID mRNA half-lives using all of the time points or only three (1, 8, and 24 hr), otherwise as in (D).
